# Supplementary material
Source: Springer Nature journal article supplement (https://www.springermedizin.de/resource/supplementary/12937_2010_358_MOESM3_ESM.pdf/25653220)
Supplement: MOESM3 [file 25653220]

Food group consumption in g/1000 Kcal

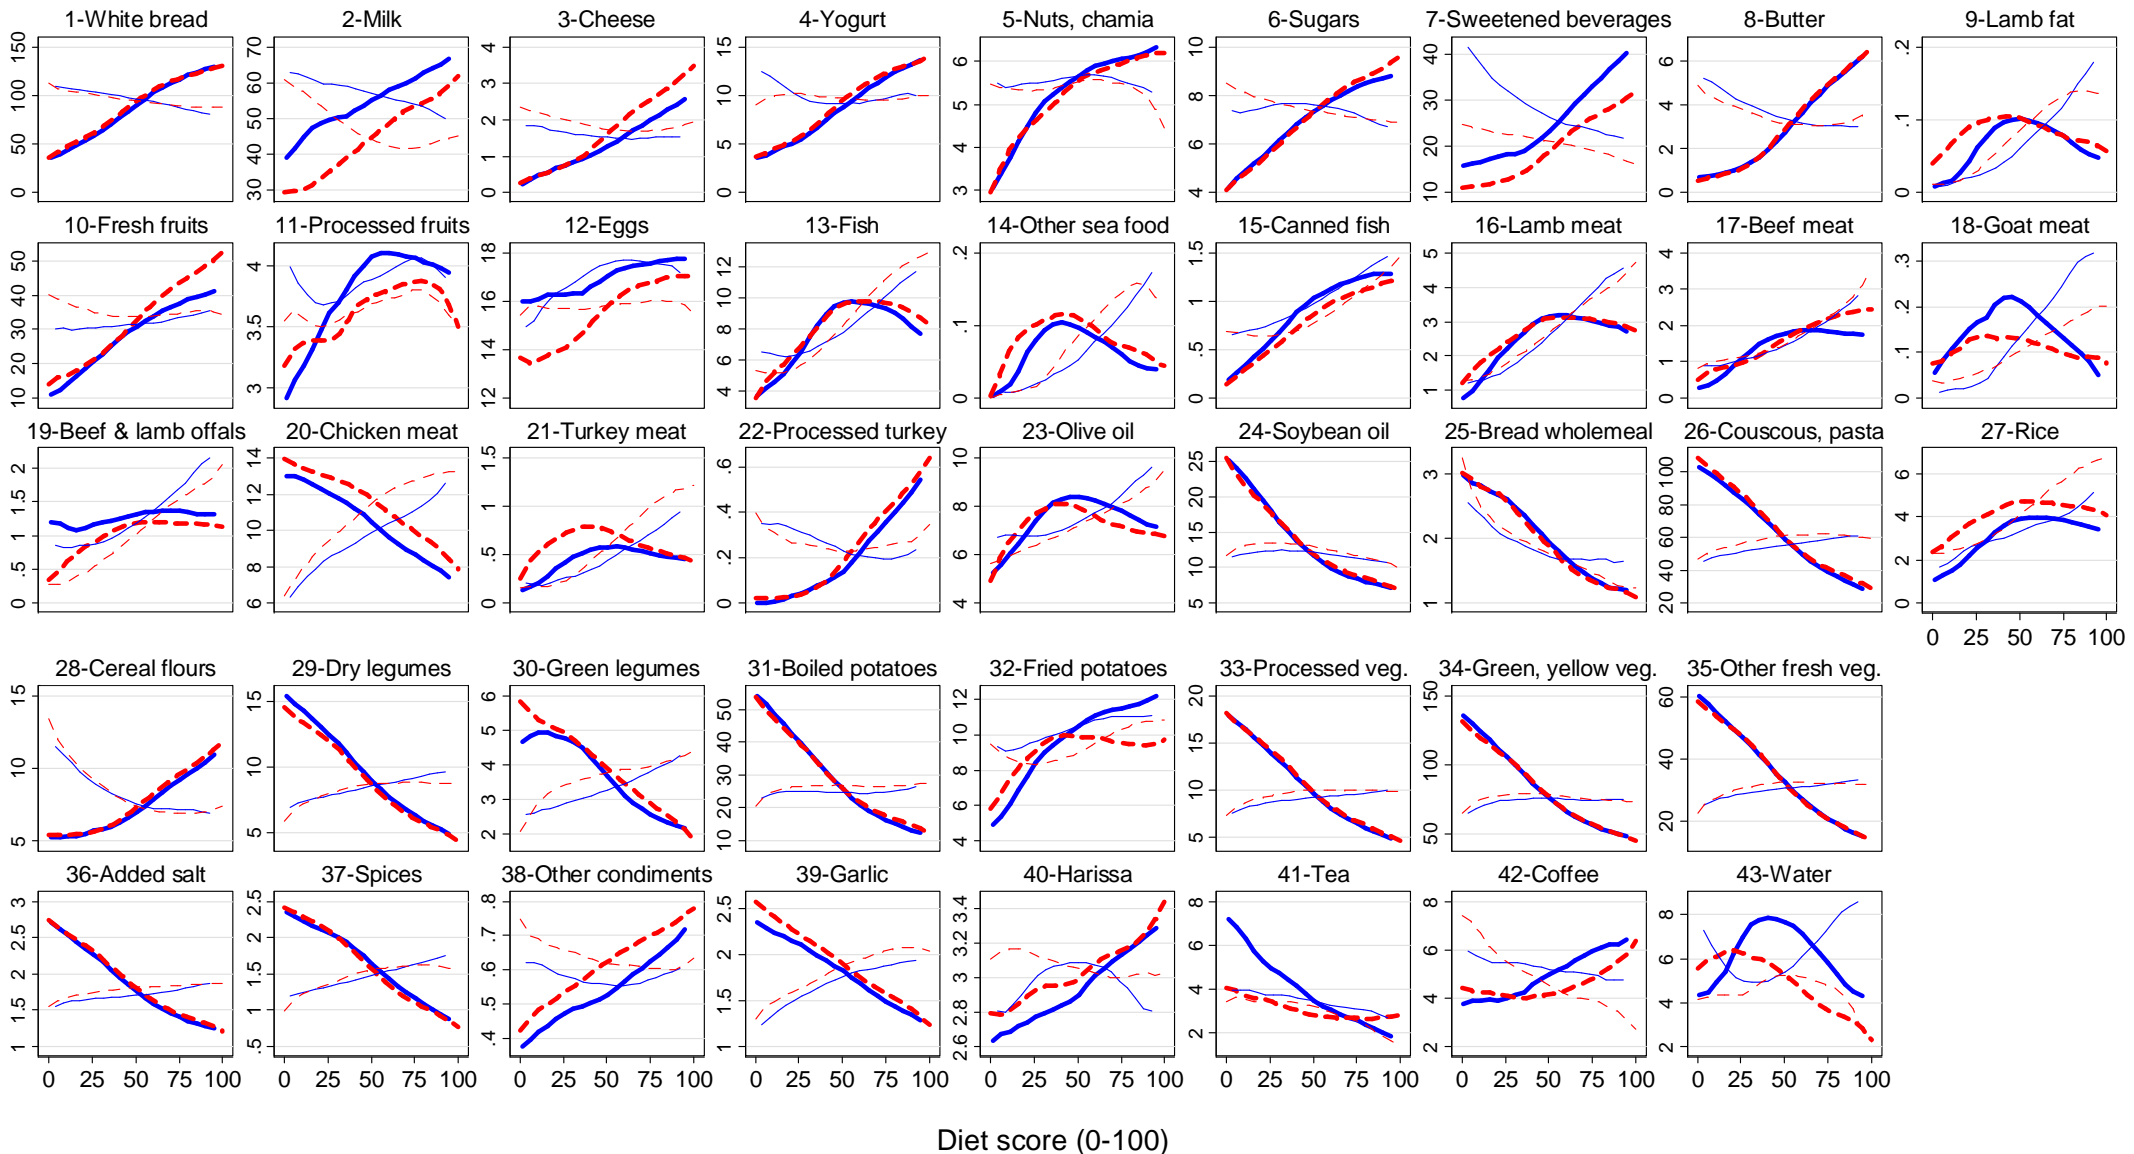

————— : modern diet score, male   
 ————— : modern diet score, female   
 - - - - - : meat-fish diet score, male   
 - - - - - : meat-fish diet score, female  
 veg.: vegetables
